# Supplementary material for: Quality Control in Fiore Sardo PDO Cheese: Detection of Heat Treatment Application and Production Chain by MRI Relaxometry and Image Analysis
Source: MDPI journal article supplement (doi:10.3390/dairy2020023), 2021-05-26
Supplement: s1 [file s1]

Archive with 1 entries (1 files):
- dairy-1152076-supplementary.pdf
