# Supplementary material for: Quality Control in Fiore Sardo PDO Cheese: Detection of Heat Treatment Application and Production Chain by MRI Relaxometry and Image Analysis
Source: MDPI journal article supplement (doi:10.3390/dairy2020023), 2021-05-26
Supplement: s1 [file s1 › dairy-1152076-supplementary.pdf]

**Table S1:** Production of FS cheeses and datasets.

|           | Production                   | Treatment                      | Analysis               | FS samples |   |           |
|-----------|------------------------------|--------------------------------|------------------------|------------|---|-----------|
| Dataset 1 | 5 Shepherds<br>(two seasons) | Raw;<br>Thermization 68°C 60 s | MRI;<br>Image analysis | S1         | → | RC<br>HTC |
|           |                              |                                |                        | S2         |   |           |
|           |                              |                                |                        | S3         |   |           |
|           |                              |                                |                        | S4         |   |           |
|           |                              |                                |                        | S5         |   |           |
| Dataset 2 | 13<br>Industrial samples     | n.a.*                          | MRI;<br>Image analysis | I1-13      |   |           |

\*n.a. not applicable

**Table S2** Moisture content (M = Mean; SD = Standard Deviation, expressed as %: g water / 100 g sample) of shepherds (from raw milk = RC; from heat-treated milk = HTC) and industrial samples (I1-13). I12 and I13 refer to cheeses from Maturer industry.

| Artisanal Samples |       |      |       |          |       |      |       | Artisanal Samples |       |      |       |          |       |      |       | Industrial Samples |       |      |       |      |     |       |      |
|-------------------|-------|------|-------|----------|-------|------|-------|-------------------|-------|------|-------|----------|-------|------|-------|--------------------|-------|------|-------|------|-----|-------|------|
| Season 1          |       |      |       |          |       |      |       | Season 2          |       |      |       |          |       |      |       |                    |       |      |       |      |     |       |      |
| 105 days          |       |      |       | 180 days |       |      |       | 105 days          |       |      |       | 180 days |       |      |       |                    |       |      |       |      |     |       |      |
| RC                |       | HTC  |       | RC       |       | HTC  |       | RC                |       | HTC  |       | RC       |       | HTC  |       |                    |       | M    | SD    | M    | SD  |       |      |
| M                 | SD    | M    | SD    | M        | SD    | M    | SD    | M                 | SD    | M    | SD    | M        | SD    | M    | SD    | M                  | SD    | I1   | 32.95 | 0.26 | I8  | 36.22 | 0.14 |
| S1                | 42.07 | 0.26 | 40.78 | 0.49     | 28.91 | 3.7  | 29.98 | 0.93              | 33.90 | 1.52 | 39.50 | 1.17     | 28.96 | 1.49 | 35.45 | 3.24               |       | I2   | 42.73 | 0.1  | I9  | 35.33 | 0.03 |
| S2                | 32.83 | 2.93 | 36.24 | 0.99     | 36.96 | 0.42 | 35.86 | 1.47              | 40.01 | 0.40 | 38.51 | 1.60     | 37.27 | 1.52 | 35.68 | 1.16               |       | I3   | 36.42 | 0.22 | I10 | 37.72 | 0.04 |
| S3                | 41.89 | 0.44 | 36.24 | 1.44     | 39.34 | 0.43 | 32.59 | 1.84              | 37.08 | 2.22 | 38.43 | 1.57     | 35.01 | 0.85 | 33.33 | 0.96               |       | I4   | 32.80 | 0.04 | I11 | 38.15 | 0.13 |
| S4                | 33.09 | 0.92 | 36.75 | 1.76     | 30.26 | 2.85 | 32.43 | 1.10              | 39.04 | 1.35 | 37.10 | 0.61     | 37.84 | 0.92 | 33.17 | 1.81               |       | I5   | 37.74 | 0.13 | I12 | 26.22 | 0.04 |
| S5                | 35.98 | 0.88 | 37.14 | 0.68     | 32.61 | 1.04 | 31.81 | 2.00              | 29.66 | 1.48 | 40.82 | 0.83     | 23.99 | 0.89 | 37.83 | 0.25               |       | I6   | 32.33 | 0.06 | I13 | 27.99 | 0.27 |
|                   |       |      |       |          |       |      |       |                   |       |      |       |          |       |      |       | I7                 | 38.45 | 0.25 |       |      |     |       |      |

## Artisanal samples

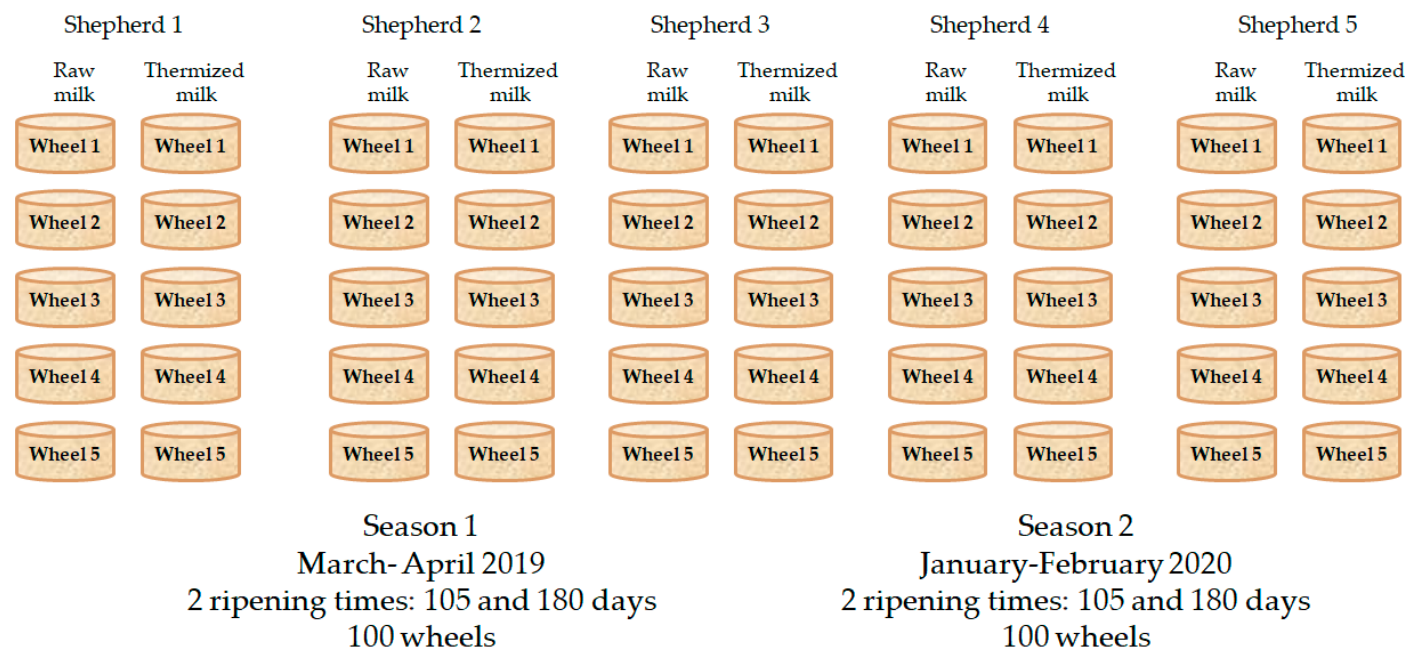

## Industrial samples

(purchased)

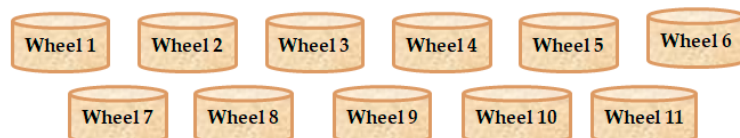

## Maturer samples

(purchased)

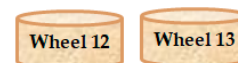

**Figure S1.** Schematic representation of the sample production and sampling plans. Raw milk refers to RC samples, Thermized milk refers to HTC samples.

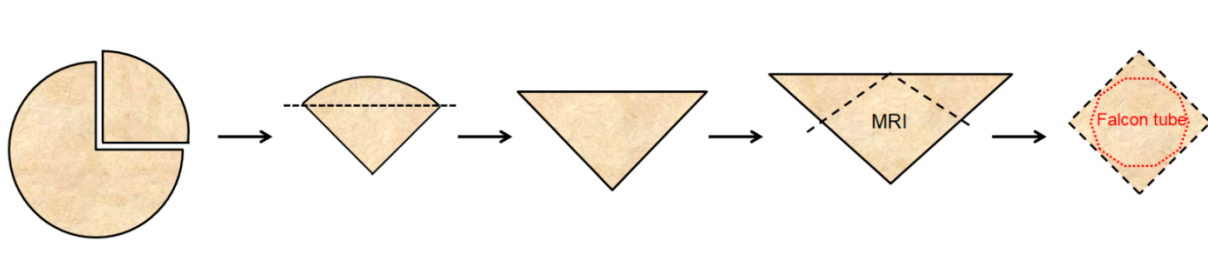

**Figure S2:** Sampling from each wheel of FS cheese for MRI analysis.

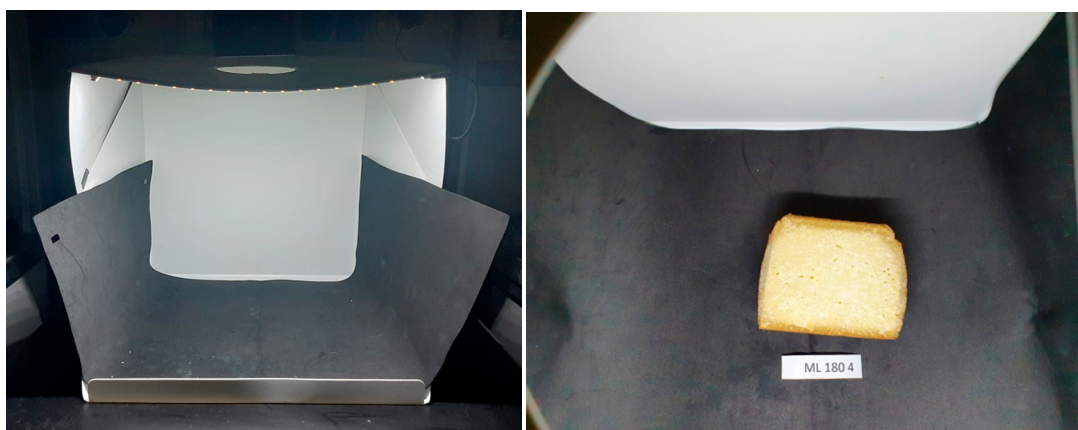

**Figure S3.** Computer Vision System (CVS) used to acquire Fiore SARDO cheese surface images.

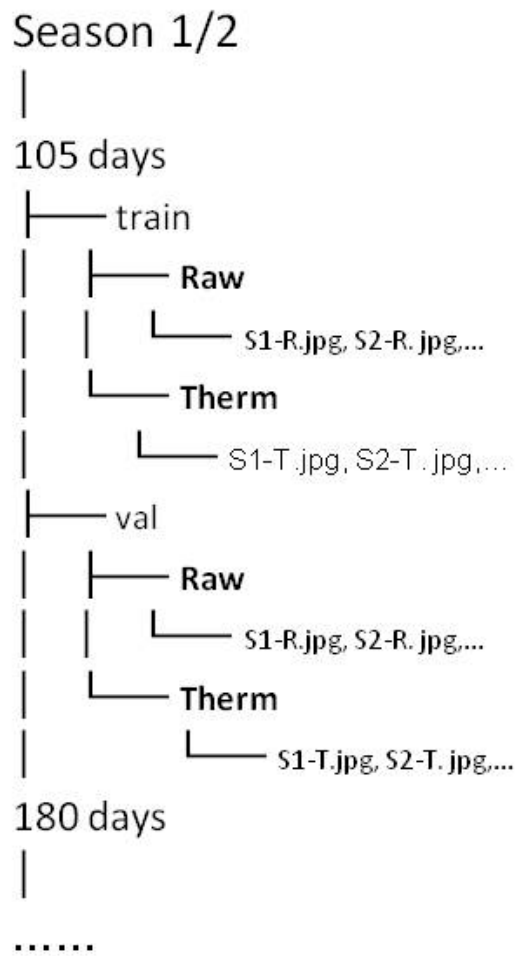

**Figure S4.** Tree diagram representing Image Dataset Directory and File Structure used for ML and DL classifications of MRI and photos datasets.

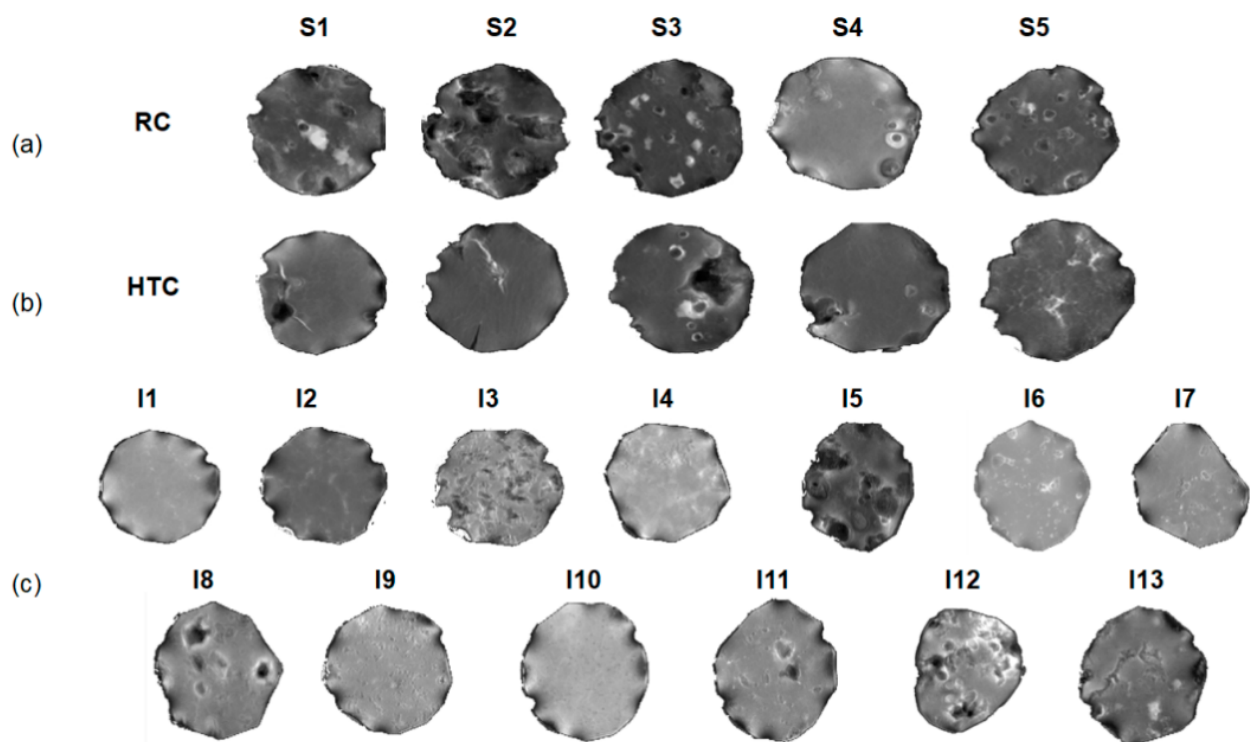

**Figure S5.** Representative T<sub>2</sub> weighted MRI images of Fiore Sardo cheeses made using either raw milk (a) or thermized milk (b); Industrial samples (c). I12 and I13 are FS samples from a maturer industry. Images refer to a selected 1mm slice of a ~2 cm-diameter cylinder at the centre of each cheese wheel sample.

**Table S3.** Performance and classification results obtained by Resnet, AlexNet, VggNet, SqueezeNet, DensNet and Inception-Net pre-trained DL frameworks on MRI T<sub>2</sub>-weighted images for classification of Dataset 1 according to cheese-making practice (RC and HTC); Average % values of accuracy and loss (for training and validation step) and training time resulted from average of five replicate runs for each model are showed.

|          |               | ResNet                  | AlexNet     | VggNet      | SqueezeNet | Densnet   | Inception-Net |             |
|----------|---------------|-------------------------|-------------|-------------|------------|-----------|---------------|-------------|
| Season 1 | 105 days      | Training Accuracy (%)   | 90.20       | 88.02       | 82.40      | 98.00     | 80.40         | 88.20       |
|          |               | Training Loss (%)       | 2.60        | 6.69        | 4.44       | 0.70      | 3.83          | 4.88        |
|          |               | Validation Accuracy (%) | 97.00       | 93.90       | 97.00      | 100.00    | 0.818         | 100.00      |
|          |               | Validation Loss (%)     | 0.80        | 5.45        | 1.36       | 0.34      | 2.62          | 0.169       |
|          |               | Training Time           | 13 m 29 s   | 12 m 50 s   | 17 m 32 s  | 14 m 25 s | 17 m 50 s     | 20 min 14 s |
|          | 180 days      | Resnet                  | AlexNet     | VggNet      | Squeezenet | Densnet   | Inception-Net |             |
|          |               | Training Accuracy (%)   | 87.20       | 91.50       | 93.60      | 95.70     | 89.40         | 87.20       |
|          |               | Training Loss (%)       | 3.26        | 2.63        | 0.274      | 0.24      | 2.30          | 3.67        |
|          |               | Validation Accuracy (%) | 100.00      | 100.00      | 94.00      | 100.000   | 100.00        | 100.00      |
|          |               | Validation Loss (%)     | 0.55        | 0.06        | 0.77       | 0.24      | 0.37          | 1.11        |
|          | Training Time | 14 min 30 s             | 15 min 23 s | 14 min 45 s | 14 m 22 s  | 17 m 32 s | 20 m 15 s     |             |
| Season 2 | 105 days      | ResNet                  | AlexNet     | VggNet      | SqueezeNet | Densnet   | Inception-Net |             |
|          |               | Training Accuracy (%)   | 77.20       | 79.20       | 81.20      | 93.80     | 87.10         | 86.20       |
|          |               | Training Loss (%)       | 4.29        | 17.25       | 4.69       | 1.17      | 3.60          | 4.91        |
|          |               | Validation Accuracy (%) | 92.70       | 76.50       | 92.70      | 100.00    | 94.10         | 94.30       |
|          |               | Validation Loss (%)     | 2.50        | 12.03       | 1.66       | 0.05      | 2.06          | 1.16        |
|          | 180 days      | Training Time           | 18 m 5 s    | 16 m 53 s   | 24 m 19 s  | 17 m 50 s | 24 m 45 s     | 18 min 41 s |
|          |               | Training Accuracy (%)   | 86.60       | 78.00       | 78.00      | 95.40     | 90.00         | 72.00       |
|          |               | Training Loss (%)       | 3.97        | 9.76        | 9.80       | 0.08      | 2.38          | 77.40       |
|          |               | Validation Accuracy (%) | 87.50       | 100.00      | 100.00     | 100.00    | 96.90         | 96.90       |
|          |               | Validation Loss (%)     | 4.29        | 0.001       | 0.06       | 0.01      | 1.12          | 1.57        |
|          | Training Time | 13 min 6 s              | 15 min 30 s | 17 min 50 s | 16 m 48 s  | 17 m 52 s | 19 min 17 s   |             |

**Table S4 .** Performance and classification results obtained by Resnet, AlexNet, VggNet, Squeezenet, Densenet and Inception-Net pre-trained DL frameworks on photographic images of Fiore Sardo surfaces of Dataset 1 (Season1, 105 days of ripening) in order to obtain classification according to cheese-making practice (RC and HTC). Average % values of accuracy and loss (for training and validation steps) and training time are resulted from average of five replicate runs for each model are showed.

|                         | ResNet    | AlexNet   | VggNet    | SqueezeNet | Densenet  | Inception-Net |
|-------------------------|-----------|-----------|-----------|------------|-----------|---------------|
| Training Accuracy (%)   | 82.20     | 74.00     | 86.00     | 96.00      | 90.00     | 74.00         |
| Training Loss (%)       | 5.09      | 1.54      | 3.68      | 1.46       | 2.96      | 6.09          |
| Validation Accuracy (%) | 96.70     | 100.00    | 96.90     | 100.00     | 96.80     | 93.80         |
| Validation Loss (%)     | 0.80      | 0.08      | 0.08      | 0.23       | 0.06      | 0.10          |
| Training Time           | 74 m 30 s | 74 m 20 s | 75 m 40 s | 68 m 38 s  | 65 m 59 s | 69 min 36 s   |
